# Supplementary material for: MATI, a Novel Protein Involved in the Regulation of Herbivore-Associated Signaling Pathways
Source: PubMed Central journal article supplement (PMC5466143; doi:10.3389/fpls.2017.00975), 2017-06-09
Supplement: Data_Sheet_1.pdf [file Data_Sheet_1.pdf]

## *Supplementary Material*

**MATI, a novel Arabidopsis protein involved in the regulation of herbivore-associated signaling pathways**

**Santamaria ME, Martinez M, Arnaiz A, Ortego F, Grbic V, Diaz I\***

**\* Correspondence:** Isabel Diaz. E-mail: [i.diaz@upm.es](mailto:i.diaz@upm.es)

### **1. Supplementary Figures and Tables**

**Supplementary Figure 1.** Molecular characterization of *Arabidopsis* transgenic lines. **(A)** Col-*mati* line validation. **(a)** Scheme of the position of the T-DNA insertion (arrowhead) in the mutant Salk (SALK\_092139C) *mati* line. **(b)** Location of the primers used for *mati* line validation and size of the expected products. See Supplementary Table 1 for the primers used. **(c)** PCR assays of *MATI* gene in Col-0 WT and *mati* lines to show homozygous status. Six day-old wild type and mutant seedlings were harvested and frozen in liquid nitrogen for DNA isolation (Lu et al., 2011). Four independent plants were analysed. **(d)** Relative expression levels of *MATI* gene normalized to UBQ in Col-WT and Col-*mati* plants 24h after mite feeding. **(B)** Expression levels of *MATI* gene in overexpressing Col-0 and Kon accessions (**a**:Col-*MATI*, **b**:Kon-*MATI* and **c**:Col-*MATI*-GFP lines) were determined by RT-qPCR assays. Gene expression, referred as fold change ( $2^{-\Delta\Delta Ct}$ ), was calculated normalizing the expression to the WT *MATI* gene. See Supplementary Table 1 for the primers used.

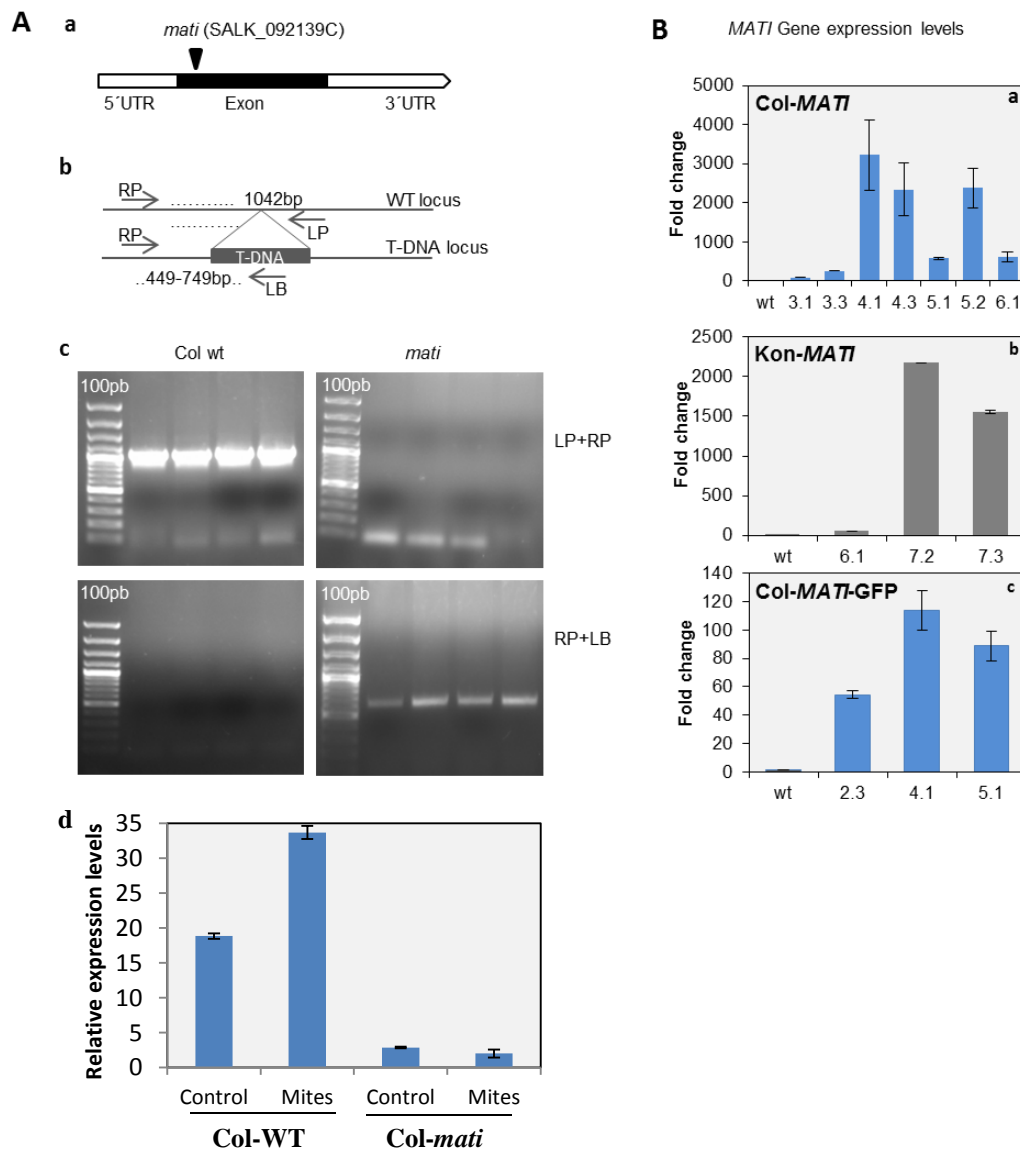

**Supplementary Figure 2.** Time course of *MATI* paralog (AT1G30260.1) gene expression in Bla-2 after spider mite infestation. Gene expression levels were normalized to the ubiquitin gene expression and to the expression in the uninfected plants. Primers were designed through PRIMER 3 (<http://bioinfo.ut.ee/primer3-0.4.0/>). See Supplementary Table 1 for the primers used.

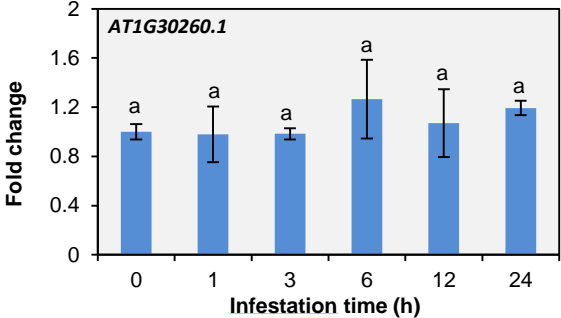

**Supplementary Figure 3.** Analysis of putative functional partners of MATI protein. **(A)** Functional enrichment classification of MATI putative interactors by GO Biological Process in STRING. **(B)** Singular Enrichment Analysis (SEA) in AgriGO. **(C)** Interactome of MATI partners removing disconnected nodes. Associations are represented from thick continuous lines for high score to thin discontinuous line for low score. Red balls represent proteins included in sulphur metabolism in STRING database.

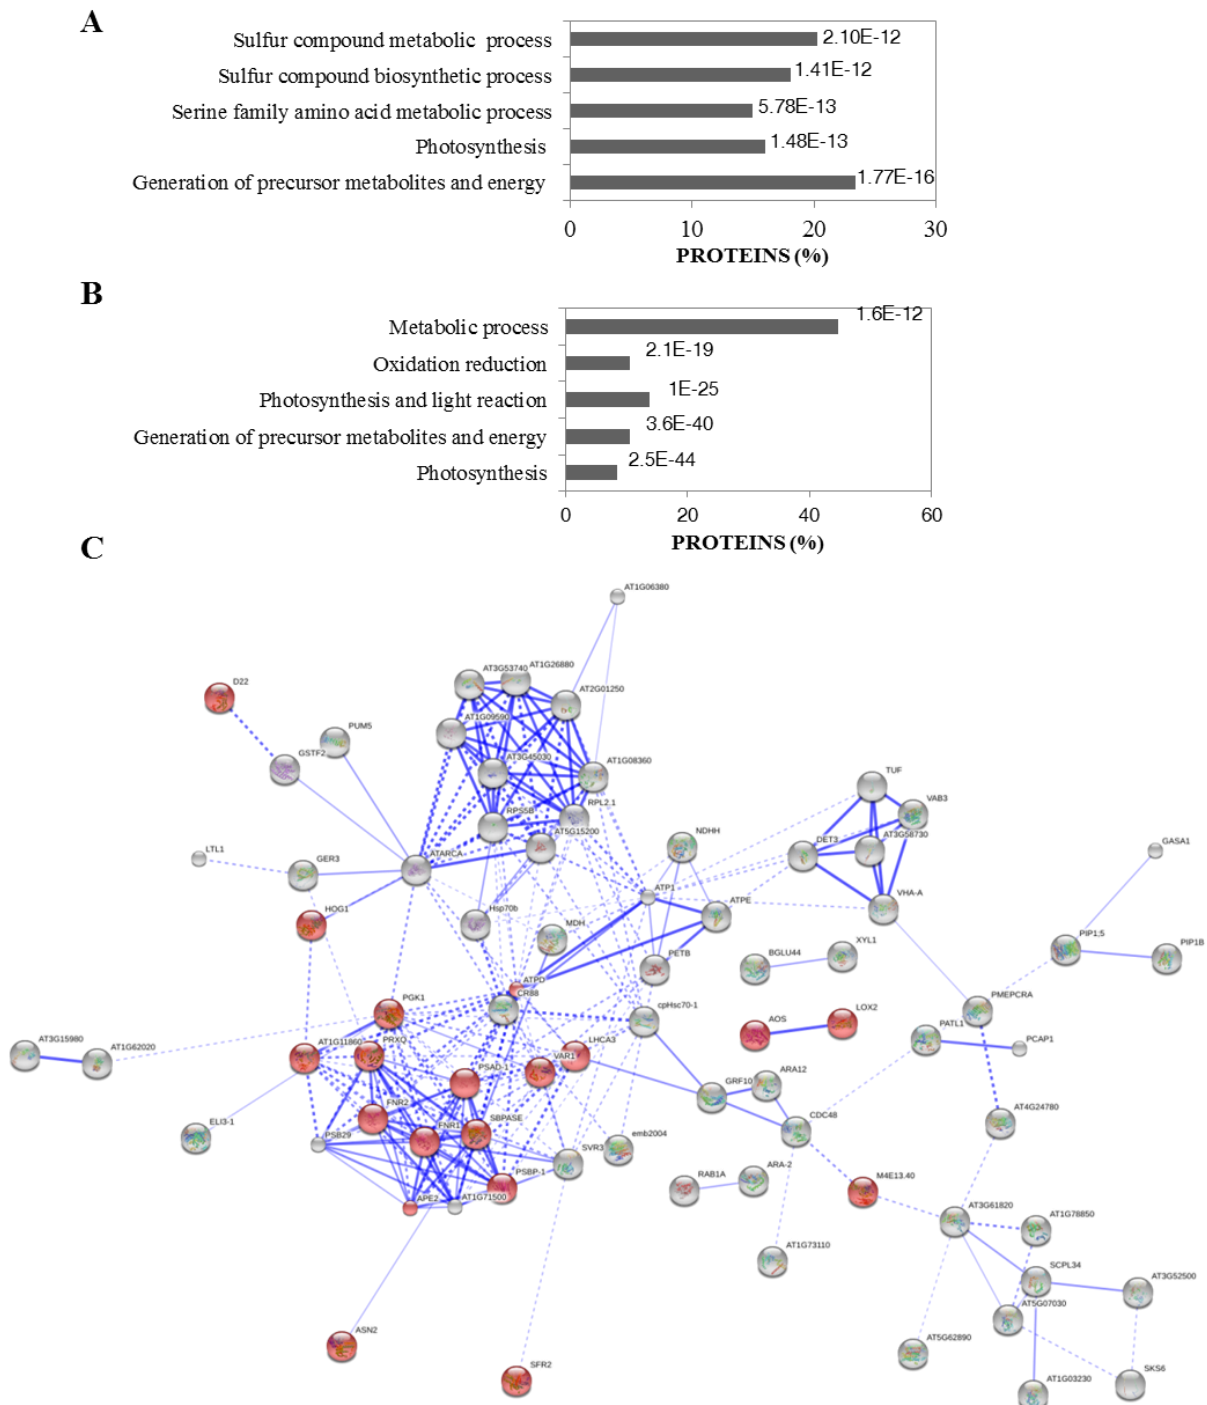

**Supplementary Figure 4.** Expression levels of hormone-related genes in the three Col-0 genotypes. **(A)** Lipoxygenase 3 (*LOX3*). **(B)** Allene Oxide Synthase (*AOS*). **(C)** MYC2 transcription factor (*MYC2*). **(D)** Vegetative Storage Protein 2 (*VSP2*). **(E)** Plant Defensin (*PDF1.2*). **(F)** Isochorismate Synthase 1 (*ICS1*). **(G)** Non-expressor of PR gene1 (*NPR1*). **(H)** Pathogenesis Related (*PR1*). Genes were analysed in Arabidopsis Col-*MATI\_4.1*, *mati* and WT plants 1h after mite infestation. Gene expression levels were normalized to the ubiquitin gene expression. Data are means  $\pm$  SE of three replicates. Different letters indicate significant differences ( $P < 0.05$ , Two-way 1243 ANOVA followed by Student-Newman-Keuls test).

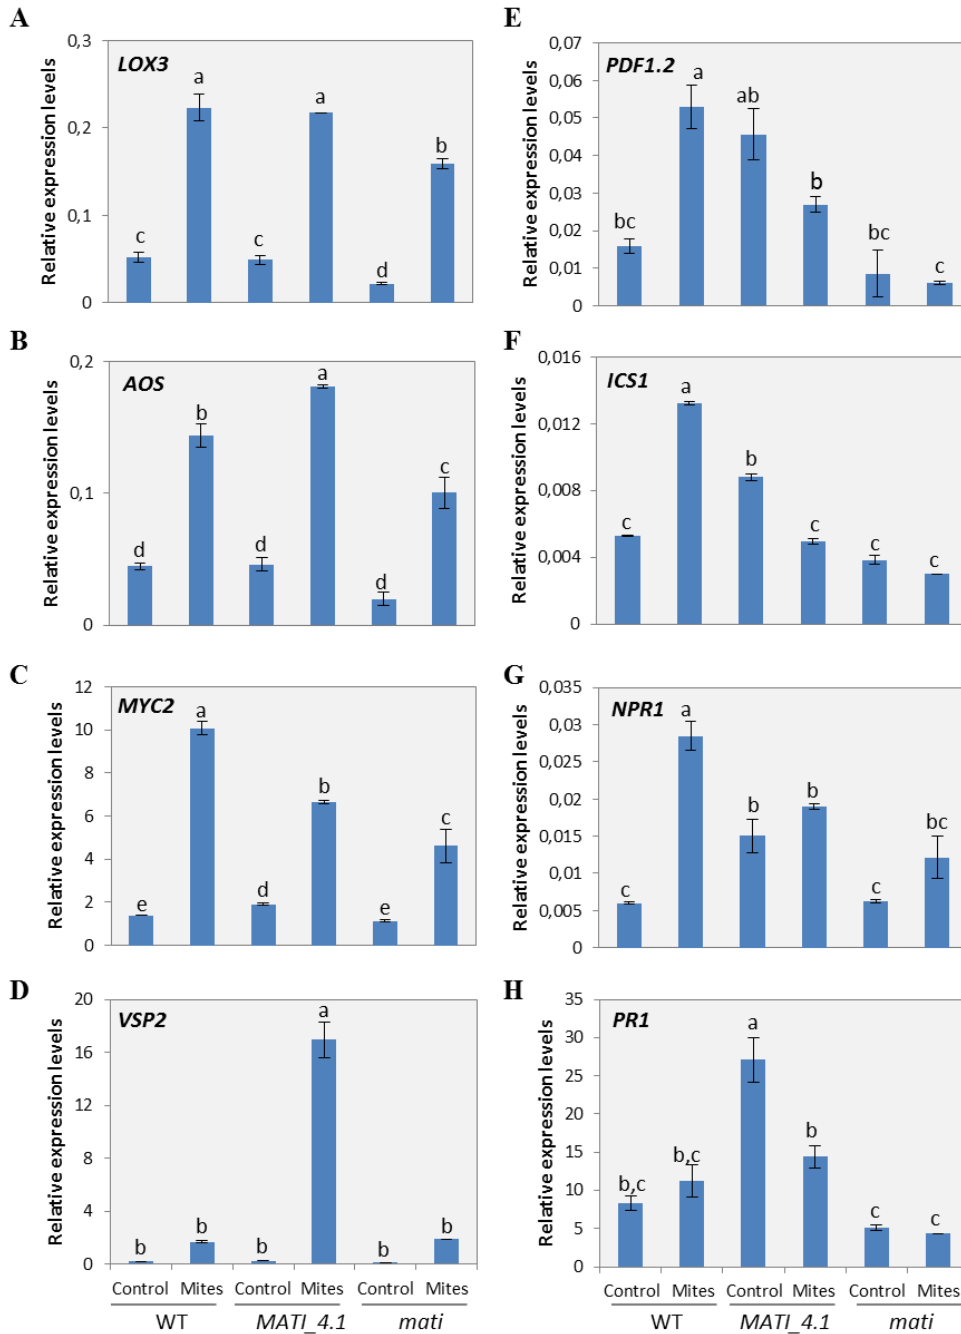

**Supplementary Figure 5.** Expression levels of ABA-related genes in the three Col-0 genotypes. **(A)** ABA deficient 1 (*ABA1*). **(B)** Regulatory Component of ABA Receptor 3 (*RCAR3*). **(C)** Responsive to Dessication 22 (*RD22*). Genes were analysed in Arabidopsis Col- *MATI\_4.1*, Col-*mati* and WT plants after mite feeding. Gene expression levels were normalized to the ubiquitin gene expression and to the expression in the uninfected plants. Data are means  $\pm$  SE of six replicates. Different letters indicate significant differences ( $P < 0.05$ , Two-way ANOVA followed by Student-Newman-Keuls test).

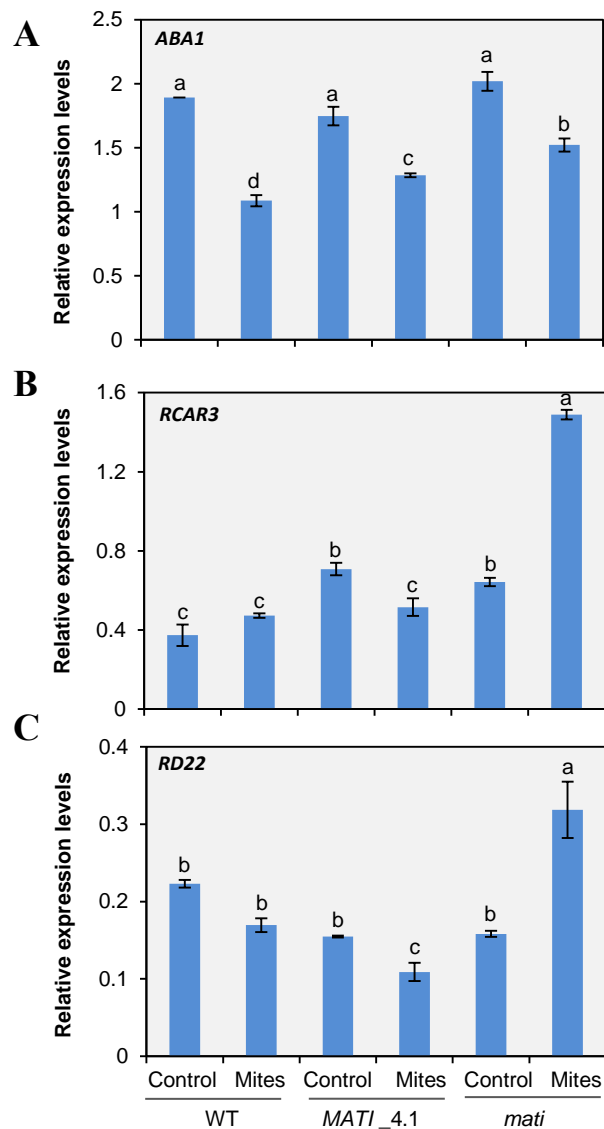

**Supplementary Table 1.** Sequences of oligonucleotide used primers (F: forward; R: reverse).

| Gene      | Primer name    | Sequence (5' → 3')            | Purpose                        |
|-----------|----------------|-------------------------------|--------------------------------|
| Ubiquitin | UBQ-F          | GCTCTTATCAAAGGACCTTCGG        | RT-qPCR-Gene expression assays |
|           | UBQ-R          | CGAACTTGAGGAGGTTGCAAAG        |                                |
| AT3G14395 | MATI-Seq-F     | CCAACAATCTCTCATTCTCT          | PCR -Cloning for sequencing    |
|           | MATI-Seq-R     | CTTCGCGTTGTTGAATGTTT          |                                |
| AT3G14395 | MATI-F         | TGACAACAATCTCCGAGGAA          | RT-qPCR-Gene expression assays |
|           | MATI-R         | GGCGTAGTGAGCAAGAGACC          |                                |
| AT1G30260 | MATI-Paralog-F | TCAGCTTCAGCTTCATGCAC          | RT-qPCR-Gene expression assays |
|           | MATI-Paralog-R | TTCTTGAAAACCGGAAAGGA          |                                |
| T-DNA     | LP             | GTCGACTAGTGTTGAGTGGG          | PCR-T-DNA insertion validation |
|           | RP             | TTTGGTGACTCGTGCATAGTG         |                                |
|           | BP643          | GCAATCAGCTGTTGCCCGTCTCACTGGTG |                                |
| AT3G14395 | pGWB:MATI-F    | CACCATGTCGGGAGCATCTTCT        | PCR-Cloning                    |
|           | pGWB2:MATI-R   | TTAGTATTTGGGACGAATTGTA        |                                |
|           | pGWB5:MATI-R   | AAAGTATTTGGGACGAATTGTA        |                                |
| AT5G42650 | AOS-F          | CGTTAGGAAGCTCCGTTAATTTCTC     | RT-qPCR-Gene expression assays |
|           | AOS-R          | TTCACGAAACTGGAACAAGAAAACA     |                                |
| AT1G32640 | MYC2-F         | TCCGAGTCCGGTTCATTCT           |                                |
|           | MYC2-R         | TCTCGGGAGAAAGTGTATTGAA        |                                |
| AT1G17420 | LOX3-F         | CGCCAATCAACAGTTTCTGA          |                                |
|           | LOX3-R         | CTCGTCTCGTGGCACATACA          |                                |
| AT5G24770 | VPS2-F         | ATGCCAAAGGACTTGCCCTA          |                                |
|           | VPS2-R         | CGGGTCCGTCTTCTCTGTTC          |                                |
| AT5G44420 | PDF1.2-F       | GTTCTCTTTGCTGCTTTTCGAC        |                                |
|           | PDF1.2-R       | GCAAACCCCTGACCATGT            |                                |
| AT1G74710 | ICS1-F         | CAAATCTCAACCTCCGTCGT          |                                |
|           | ICS1-R         | AATCAATTGCTCCGATTTGC          |                                |
| AT1G64280 | NPR1-F         | TGCATCAGAAGCAACTTTGG          |                                |
|           | NPR1-R         | GGCCTTTGAGAGAATGCTTG          |                                |
| AT2G14610 | PR1-F          | TCAGTGAGACTCGGATGTGC          |                                |
|           | PR1-R          | CGTTCACATAATTCCCACGA          |                                |
| AT5G67030 | ABA1-F         | CTCACTGACAAAGCCGATGA          |                                |
|           | ABA1-R         | GTCGCCGTGTGGAATTAGAT          |                                |
| AT5G53160 | RCAR3-F        | TGTGGTGAAAGGAAACATGG          |                                |
|           | RCAR3-R        | TCACCACCAACGATTCTGAT          |                                |
| AT5G25610 | RD22-F         | CCGGTAAAAGAACCGACGTA          |                                |
|           | RD22-R         | ATCGTCGTGGAGCTGAGTCT          |                                |

**Supplementary Table 2.** Statistical results obtained with GraphPad Prism 6 software. The F-value, the degrees of freedom from the numerator (dfn) and denominator (dfd) and the P-value are indicated. For the ANOVA two factor tests the F-value is indicated for the interaction (I), the treatment (T) and the MATI genotype (G).

| Figure | Test                                  | F (dfn,dfd)             | P            |
|--------|---------------------------------------|-------------------------|--------------|
| 1B     | ANOVA One Factor (Kon)                | $F_{(5,12)}=60.10$      | $P<0.0001$   |
|        | ANOVA One Factor (Col)                | $F_{(5,12)}=27.90$      | $P<0.0001$   |
|        | ANOVA One Factor (Bla-2)              | $F_{(5,12)}=289.90$     | $P<0.0001$   |
| 3A     | ANOVA One Factor                      | $F_{(7,16)}=23.83$      | $P<0.0001$   |
| 4A     | ANOVA One Factor                      | $F_{(6,35)}=73.88$      | $P<0.0001$   |
| 4B     | ANOVA One Factor                      | $F_{(2,93)}=10.73$      | $P<0.0001$   |
| 4D     | ANOVA One Factor ( <i>T.urticae</i> ) | $F_{(2,21)}=9.48$       | $P=0.0012$   |
|        | ANOVA One Factor ( <i>S.exigua</i> )  | $F_{(2,98)}=42.26$      | $P<0.0001$   |
| 5A     | ANOVA Two Factor                      | $F_{(2,30)}=42.60$ (I)  | $P<0.0001$   |
|        |                                       | $F_{(1,30)}=124.6$ (T)  | $P<0.0001$   |
|        |                                       | $F_{(2,30)}=332.9$ (G)  | $P<0.0001$   |
| 5B     | ANOVA Two Factor                      | $F_{(2,30)}=46.15$ (I)  | $P<0.0001$   |
|        |                                       | $F_{(1,30)}=318$ (T)    | $P<0.0001$   |
|        |                                       | $F_{(2,30)}=77.54$ (G)  | $P<0.0001$   |
| 5C     | ANOVA Two Factor                      | $F_{(2,30)}=35.64$ (I)  | $P<0.0001$   |
|        |                                       | $F_{(1,30)}=186$ (T)    | $P<0.0001$   |
|        |                                       | $F_{(2,30)}=37.11$ (G)  | $P<0.0001$   |
| 5D     | ANOVA Two Factor                      | $F_{(2,30)}=10.41$ (I)  | $P<0.0001$   |
|        |                                       | $F_{(1,30)}=9.97$ (T)   | $P<0.0001$   |
|        |                                       | $F_{(2,30)}=1.749$ (G)  | $P<0.0001$   |
| 5E     | ANOVA Two Factor                      | $F_{(2,30)}=26.09$ (I)  | $P<0.0001$   |
|        |                                       | $F_{(1,30)}=13.41$ (T)  | $P=0.001$    |
|        |                                       | $F_{(2,30)}=4.6$ (G)    | $P=0.0177$   |
| 6A     | ANOVA Two Factor                      | $F_{(2,30)}=10.37$ (I)  | $P<0.0001$   |
|        |                                       | $F_{(1,30)}=171.9$ (T)  | $P<0.0001$   |
|        |                                       | $F_{(2,30)}=5.509$ (G)  | $P<0.0001$   |
| 6B     | ANOVA Two Factor                      | $F_{(2,30)}=39.48$ (I)  | $P<0.0001$   |
|        |                                       | $F_{(1,30)}=777.0$ (T)  | $P<0.0001$   |
|        |                                       | $F_{(2,30)}=29.93$ (G)  | $P<0.0001$   |
| 6C     | ANOVA Two Factor                      | $F_{(2,30)}=1.632$ (I)  | $P=0.2715$   |
|        |                                       | $F_{(1,30)}=67.19$ (T)  | $P<0.0001$   |
|        |                                       | $F_{(2,30)}=3.265$ (G)  | $P=0.0521$   |
| 6D     | ANOVA Two Factor                      | $F_{(2,30)}=45.92$ (I)  | $P<0.0001$   |
|        |                                       | $F_{(1,30)}=11.17$ (T)  | $P=0.0018$   |
|        |                                       | $F_{(2,30)}=44.39$ (G)  | $P<0.0001$   |
| 6E     | ANOVA Two Factor                      | $F_{(2,30)}=48.61$ (I)  | $P<0.0001$   |
|        |                                       | $F_{(1,30)}=63.79$ (T)  | $P<0.0001$   |
|        |                                       | $F_{(2,30)}=36.77$ (G)  | $P<0.0001$   |
| 7A     | ANOVA Two Factor                      | $F_{(2, 12)}=91.91$ (I) | $P < 0.0001$ |
|        |                                       | $F_{(1, 12)}=174.3$ (T) | $P < 0.0001$ |
|        |                                       | $F_{(2, 12)}=108.1$ (G) | $P < 0.0001$ |
| 7B     | ANOVA Two Factor                      | $F_{(2, 12)}=266.9$ (I) | $P < 0.0001$ |
|        |                                       | $F_{(1, 12)}=1270$ (T)  | $P < 0.0001$ |
|        |                                       | $F_{(2, 12)}=532.2$ (G) | $P < 0.0001$ |
| 7C     | ANOVA Two Factor                      | $F_{(2, 12)}=56.52$ (I) | $P < 0.0001$ |
|        |                                       | $F_{(1, 12)}=541.0$ (T) | $P < 0.0001$ |
|        |                                       | $F_{(2, 12)}=245.0$ (G) | $P < 0.0001$ |
| 7D     | ANOVA Two Factor                      | $F_{(2, 12)}=1768$ (I)  | $P < 0.0001$ |
|        |                                       | $F_{(1, 12)}=9676$ (T)  | $P < 0.0001$ |



|     |                  |                                                                                 |                                              |
|-----|------------------|---------------------------------------------------------------------------------|----------------------------------------------|
|     |                  | $F_{(2, 12)}=1637$ (G)                                                          | $P < 0.0001$                                 |
| 7E  | ANOVA Two Factor | $F_{(2, 12)}=1233$ (I)<br>$F_{(1, 12)}=17317$ (T)<br>$F_{(2, 12)}=1412$ (G)     | $P < 0.0001$<br>$P < 0.0001$<br>$P < 0.0001$ |
| 7F  | ANOVA Two Factor | $F_{(2, 12)}=7.634$ (I)<br>$F_{(1, 12)}=0.5050$ (T)<br>$F_{(2, 12)}=6.408$ (G)  | $P = 0.0073$<br>$P = 0.4909$<br>$P = 0.0128$ |
| 7G  | ANOVA Two Factor | $F_{(2, 12)}=1.374$ (I)<br>$F_{(1, 12)}=1.969$ (T)<br>$F_{(2, 12)}=17.71$ (G)   | $P = 0.2902$<br>$P = 0.1859$<br>$P = 0.0003$ |
| 7H  | ANOVA Two Factor | $F_{(2, 12)}=229.1$ (I)<br>$F_{(1, 12)}=66.38$ (T)<br>$F_{(2, 12)}=20.29$ (G)   | $P < 0.0001$<br>$P < 0.0001$<br>$P = 0.0001$ |
| S2  | ANOVA One factor | $F_{(5, 12)}=0.3708$                                                            | $P = 0.8591$                                 |
| S4A | ANOVA Two Factor | $F_{(2, 12)}=9.653$ (I)<br>$F_{(1, 12)}= 2035$ (T)<br>$F_{(2, 12)}=72.55$ (G)   | $P = 0.0032$<br>$P < 0.0001$<br>$P < 0.0001$ |
| S4B | ANOVA Two Factor | $F_{(2, 12)}=6.433$ (I)<br>$F_{(1, 12)}=225.9$ (T)<br>$F_{(2, 12)}=17.23$ (G)   | $P = 0.0126$<br>$P < 0.0001$<br>$P = 0.0003$ |
| S4C | ANOVA Two Factor | $F_{(2, 12)}= 99.30$ (I)<br>$F_{(1, 12)}= 1232$ (T)<br>$F_{(2, 12)}= 98.57$ (G) | $P < 0.0001$<br>$P < 0.0001$<br>$P < 0.0001$ |
| S4D | ANOVA Two Factor | $F_{(2, 12)}=85.73$ (I)<br>$F_{(1, 12)}=159.3$ (T)<br>$F_{(2, 12)}=87.88$ (G)   | $P < 0.0001$<br>$P < 0.0001$<br>$P < 0.0001$ |
| S4E | ANOVA Two Factor | $F_{(2, 12)}=12.34$ (I)<br>$F_{(1, 12)}=1.413$ (T)<br>$F_{(2, 12)}=14.15$ (G)   | $P = 0.0012$<br>$P = 0.2576$<br>$P = 0.0007$ |
| S4F | ANOVA Two Factor | $F_{(2, 12)}=81.56$ (I)<br>$F_{(1, 12)}=7.71$ (T)<br>$F_{(2, 12)}=75.03$ (G)    | $P < 0.0001$<br>$P = 0.0168$<br>$P < 0.0001$ |
| S4G | ANOVA Two Factor | $F_{(2, 12)}=19.42$ (I)<br>$F_{(1, 12)}=66.02$ (T)<br>$F_{(2, 12)}=15.90$ (G)   | $P < 0.0001$<br>$P < 0.0001$<br>$P < 0.0001$ |
| S4H | ANOVA Two Factor | $F_{(2, 12)}=11.65$ (I)<br>$F_{(1, 12)}=7.909$ (T)<br>$F_{(2, 12)}=49.20$ (G)   | $P = 0.0015$<br>$P = 0.0157$<br>$P < 0.0001$ |
| S5A | ANOVA Two Factor | $F_{(2, 12)}=3.779$ (I)<br>$F_{(1, 12)}=111.6$ (T)<br>$F_{(2, 12)}=10.34$ (G)   | $P = 0.0534$<br>$P < 0.0001$<br>$P = 0.0025$ |
| S5B | ANOVA Two Factor | $F_{(2, 12)}=96.71$ (I)<br>$F_{(1, 12)}=63.53$ (T)<br>$F_{(2, 12)}=147.0$ (G)   | $P < 0.0001$<br>$P < 0.0001$<br>$P < 0.0001$ |
| S5C | ANOVA Two Factor | $F_{(2, 12)}=26.27$ (I)<br>$F_{(1, 12)}=2.096$ (T)<br>$F_{(2, 12)}=21.50$ (G)   | $P < 0.0001$<br>$P = 0.1733$<br>$P = 0.0001$ |
